# Supplementary material for: Long-term therapeutic silencing of miR-33 increases circulating triglyceride levels and hepatic lipid accumulation in mice
Source: PubMed Central journal article supplement (PMC4197861; doi:10.15252/emmm.201404046), 2014-07-18

Figure 2K

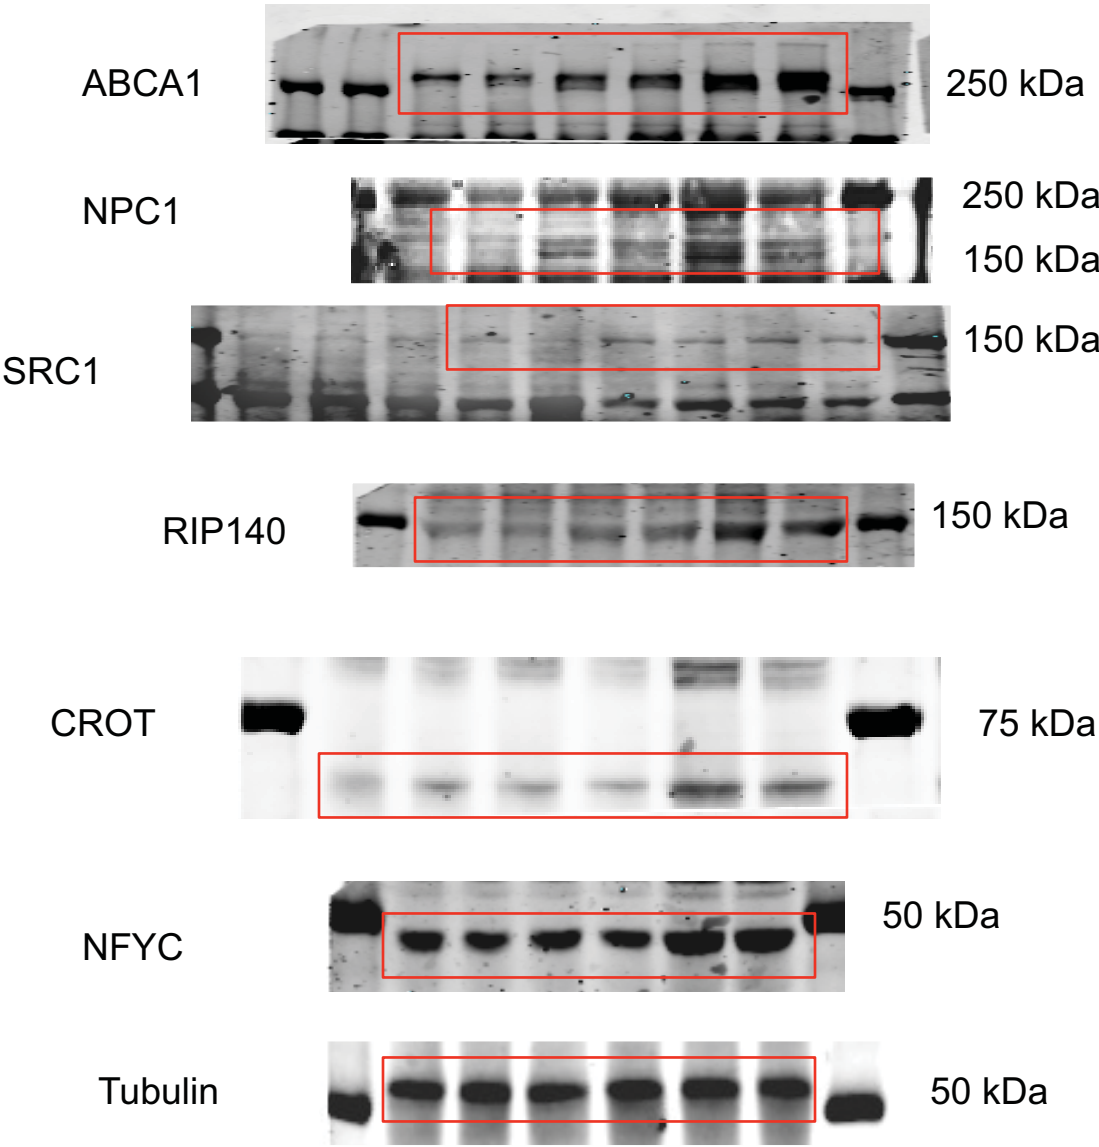

Supplement: emmm0006-1133-SD4.pdf [file emmm0006-1133-SD4.pdf]
